# Supplementary material
Source: publisher figshare collection journal article supplement (https://sage.figshare.com/ndownloader/files/18057722)
Supplement: Supplementary file 1 [file 18057722]

| Appendix A |  |  |  |  |  |  |  |  |  |
| --- | --- | --- | --- | --- | --- | --- | --- | --- | --- |
|  |  |  |  |  |  |  |  |  |  |
| *Probe Sheet Sample Problems* |  |  |  |  |  |  |  |  |  |
|  |  |  |  |  |  |  |  |  |  |
| **Sample Problem** | **BL** | **PPW** | **CH** | **CO** | **PPW-G** | **CH-G** | **CO-G** | **MS** | **Comb** |
| There were 11 students in the lunch line when 12 more students got in line. How many students are  in the lunch line now? | X |  | X |  |  |  |  | X |  |
| Ms. Smith has 12 boys and some girls in her class. If she has 25 total students in her class, how  many girls are in her class? | X | X |  |  |  |  |  | X |  |
| Mr. Rodgers had $73 in his wallet. Mr. Eddie has $61 in his wallet. How much more money did  Mr. Rodgers have in his wallet? | X |  |  | X |  |  |  | X |  |
| Betty Sue owns 12 horses, 15 cows, and a bunch of chickens. If she owns 38 animals in all, how many chickens does she own? |  |  |  |  | X |  |  |  |  |
| Cherokee weighed 22 pounds when we bought her. She put on 16 pounds the first year and 11 pounds the second year. How much does Cherokee weigh now? |  |  |  |  |  | X |  |  |  |
| The Bulldog weighs 48 pounds. The Rottweiler weighs 21 more pounds than the bulldog. The Corgi weighs 35 less pounds than the Rottweiler. How much does the Corgi weigh? |  |  |  |  |  |  | X |  |  |
| There were 12 engineers and 11 architects at the meeting. A bunch of engineers showed up late to the meeting. If there are now only 38 people at the meeting, how many engineers showed up late? |  |  |  |  |  |  |  |  | X |

*Note*. BL = baseline; PPW = part-part-whole; CH = change; CO = compare; PPW-G = part-part-whole generalized; CH-G = change generalized; CO-G = compare generalized; MS = mixed schemas; Comb = combined schemas.

| Appendix B | | |
| --- | --- | --- |
|  |  |  |
| *Teacher Responses on the School intervention Package Rating Form -Teacher* | | |
|  |  |  |
| **Construct** | **Item** | **Score** |
| Suitability | How much did you like the procedures used in the intervention? | 7 |
| Suitability | How acceptable did you find this intervention to be regarding your concerns? | 7 |
| Suitability | How willing were you to change your routine to carry out this intervention? | 6 |
| Suitability | How willing were you to carry out this intervention? | 7 |
| Suitability | How well did carrying out this intervention fit into your routine? | 5 |
| Suitability | Given your students math problems, how reasonable did you find the intervention? | 6 |
| Suitability | How clear is your understanding of the intervention after having used it in your classroom (or with your student)? | 7 |
| Suitability | To what extent were there disadvantages in implementing this intervention? | 6* |
| Perceived Benefit | How severe are your student’s math difficulties now? | 4 |
| Perceived Benefit | Compared with other adolescents with math problems, how serious are your student’s problems? | 5 |
| Perceived Benefit | How likely is this intervention package to make permanent improvements in your student’s math performance? | 6 |
| Perceived Benefit | How effective was this intervention package? | 6 |
| Perceived Benefit | How effective was this intervention package for your student(s)? | 5 |
| Perceived Benefit | To what degree are your student’s math problems of concern to you? | 7 |
| Convenience | How disruptive was it to the class to carry out this intervention package? | 4 |
| Convenience | How costly was it to carry out this intervention package? | 7* |
| Convenience | How much time each day was needed for you to carry out this intervention package? | 4 |
| Convenience | To what extent did undesirable side effects occur as a result of this intervention package? | 7* |
| Convenience | How affordable was this intervention package for your classroom? | 7 |
| Convenience | How much discomfort did your student experience during the course of this intervention package? | 6* |

Appendix C

*Study Level BC-SMD*

| **BC-SMD** | **Std. Error** | **CI95 Lower** | **CI95 Upper** | **DF** | **Auto Correlation** | **ICC** |
| --- | --- | --- | --- | --- | --- | --- |
| 3.05 | 0.27 | 2.54 | 3.60 | 98.30 | 0.28 | 0.10 |

*Note*. BC-SMD = Between Case-Standardized Mean Difference; CI95 = 95% Confidence Interval; DF = Degrees of Freedom; ICC = Intraclass Correlation.

*Study Level Tau-U*

| **Tau-U** | **Std. Error** | **CI90 Lower** | **CI90 Upper** | **Pairs** |
| --- | --- | --- | --- | --- |
| 0.95 | 0.08 | 0.83 | 1.00 | 1,320 |

*Note*. CI90 = 90% Confidence Interval.

Appendix D

*Fidelity Checklist*

Observer Name: ______________________________

Teacher: ______________________________

Date: ________________________________

Group of Students Observed:___________________________

_____ Orally states the objective for the day’s learning

_____ States the purpose for being a better problem solver (can be through student discussion)

_____ States the behavioral expectations for the day (i.e. raise hands or….)

**Record Start Time as Modeling Problem 1 Begins: ______________________

Modeling Problem 1 (Required)

*Teacher must do all modeling steps first, students can respond if teacher has modeling correctly first).*

_____ Models identifying key information in the problem (underline the question and quantities)

_____ Models identifying the structure of the problem (part-part-whole, compare, change)

_____ Models putting information in the appropriate place on the schematic diagram

_____ Models identifying an appropriate solution plan

_____ Models computing the problem to find the solution (can use calculators)

_____ Models checking answer for reasonableness

Modeling Problem 2 (If needed)

_____ Models identifying key information in the problem

_____ Models identifying the structure of the problem (part-part-whole, compare, change)

_____ Models putting information in the appropriate place on the schematic diagram

_____ Models identifying an appropriate solution plan

_____ Models computing the problem to find the solution

_____ Models checking answer for reasonableness

Modeling Problem 3 (If needed)

_____ Models identifying key information in the problem

_____ Models identifying the structure of the problem (part-part-whole, compare, change)

_____ Models putting information in the appropriate place on the schematic diagram

_____ Models identifying an appropriate solution plan

_____ Models computing the problem to find the solution

_____ Models checking answer for reasonableness

Guided Practice Problem 1 (Required)

*Teacher should not be fully modeling. Teacher should correct errors as necessary.*

_____ Prompt identifying key information in the problem

_____ Prompt identifying the structure of the problem (part-part-whole, compare, change)

_____ Prompt putting information in the appropriate place on the schematic diagram

_____ Prompt identifying an appropriate solution plan

_____ Prompt computing the problem to find the solution

_____ Prompt checking answer for reasonableness

Guided Practice Problem 2 (Required)

**Note if any/all students were dismissed from this guided practice due to not needing it: _______________________________________________________________________

_____ Prompt identifying key information in the problem

_____ Prompt identifying the structure of the problem (part-part-whole, compare, change)

_____ Prompt putting information in the appropriate place on the schematic diagram

_____ Prompt identifying an appropriate solution plan

_____ Prompt computing the problem to find the solution

_____ Prompt checking answer for reasonableness

Guided Practice Problem 3 (If needed)

**Note if any/all students were dismissed from this guided practice due to not needing it: _______________________________________________________________________

_____ Prompt identifying key information in the problem

_____ Prompt identifying the structure of the problem (part-part-whole, compare, change)

_____ Prompt putting information in the appropriate place on the schematic diagram

_____ Prompt identifying an appropriate solution plan

_____ Prompt computing the problem to find the solution

_____ Prompt checking answer for reasonableness

***Record STOP time after all Guided Practice is complete for all students: _______________

Conclusion

_____ Restates objective

_____ Solicits student input on how objective was addressed

Probe Sheet

Title of Probe Sheet: _______________________________________________

_____ Presents students with appropriate probe sheet (verify from schedule).

_____ Known adult ONLY reads each item aloud to students

_____ Does not provide support to students (give feedback or suggestions on how to proceed….can give positive general praise but not specific to the work on the probes)

Observer Notes: Below, record any discrepancies, problems or issues that occurred during your observation (could include if fire alarm occurred, student behavior problems, if some students started probe before others, and if adult was prompting students on probe sheets).

Appendix E

*References From Figure 2*

Flores, M. M., Hinton, V. M., & Burton, M. E. (2016). Teaching problem solving to students receiving tiered interventions using the concrete-representational-abstract sequence and schema-based instruction. *Preventing School Failure: Alternative Education for Children and Youth, 60*, 345–355.

Hutchinson, N. L. (1993). Students with disabilities and mathematics education reform—Let the dialogue begin. *Remedial and Special Education, 14*, 20–23.

Jaspers, M. W., & Van Lieshout, E. C. (1994). The evaluation of two computerised instruction programs for arithmetic word-problem solving by educable mentally retarded children. *Learning and Instruction, 4*, 193–215.

Jitendra, A. K., Hoff, K., & Beck, M. M. (1999). Teaching mid-dle school students with learning disabilities to solve word problems using a schema-based approach. *Journal for Special Educators, 20*, 50–64.

Jitendra, A. K., DiPipi, C. M., & Perron-Jones, N. (2002). An exploratory study of schema-based word-problem—Solving instruction for middle school students with learning disabilities: An emphasis on conceptual and procedural understanding. *The Journal of Special Education, 36*, 23–38.

Neef, N. A., Nelles, D. E., Iwata, B. A., & Page, T. J. (2003). Analysis of precurrent skills in solving mathematics story problems. *Journal of Applied Behavior Analysis, 36*, 21–33.

Peltier, C., & Vannest, K. J. (2016). Schema-based strategy instruction and the mathematical problem-solving performance of two students with emotional or behavioral disorders. *Education and Treatment of Children, 39*(4), 521-543.

Peltier, C., & Vannest, K. J. (2018). The effects of schema-based instruction on the mathematical problem solving of students with emotional and behavioral disorders. *Behavioral Disorders, 43*(2), 277-289.

Reneau, J. L. (2012). *Using the concrete-representational-abstract sequence to connect manipulatives, problem solving schemas, and equations in word problems with fractions* (Unpublished doctoral dissertation). West Virginia University, Morgantown.

Rockwell, S. B., Griffin, C. C., & Jones, H. A. (2011). Schema-based strategy instruction in mathematics and the word problem-solving performance of a student with autism. *Focus on Autism and Other Developmental Disabilities, 26*, 87–95.

Root, J. R., Browder, D. M., Saunders, A. F., & Lo, Y. Y. (2017). Schema-based instruction with concrete and virtual manipulatives to teach problem solving to students with autism. *Remedial and Special Education, 38*, 42–52.

Saunders, A. F. (2014). *Effects of schema-based instruction delivered through computer-based video instruction on mathematical word problem solving of students with autism spectrum disorder and moderate intellectual disability* (Unpublished doctoral dissertation). The University of North Carolina at Charlotte.

Xin, Y. P. (2008). The effect of schema-based instruction in solving mathematics word problems: An emphasis on prealgebraic conceptualization of multiplicative relations. *Journal for Research in Mathematics Education*, 526-551.

Xin, Y. P., Wiles, B., & Lin, Y. Y. (2008). Teaching conceptual model-based word problem story grammar to enhance mathematics problem solving. *The Journal of Special Education, 42*, 163–178.

Xin, Y. P., & Zhang, D. (2009). Exploring a conceptual model-based approach to teaching situated word problems. *The Journal of Educational Research, 102*, 427–442.
